# Supplementary material for: Serum amylase elevation is associated with adverse clinical outcomes in patients with coronavirus disease 2019
Source: Aging (Albany NY). 2021 Oct 29;13(20):23442–58. doi: 10.18632/aging.203653 (PMC8580346; doi:10.18632/aging.203653)
Supplement: Supplementary Table 1 [file aging-13-203653-s002.pdf]

## SUPPLEMENTARY TABLE

**Supplementary Table 1. The clinical characteristics of patients with 3 times ULN.**

| Characteristics                                     | Above 3 folds of ULN (N=19) |
|-----------------------------------------------------|-----------------------------|
| Age- yr                                             | 69[64, 76]                  |
| Age≥ 65                                             | 14 (73.7)                   |
| Male                                                | 11 (57.9)                   |
| BMI                                                 | 23.87 [23.47, 25.74]        |
| Time from illness onset to hospital admission, days | 10[7, 15]                   |
| Severe pneumonia*                                   | 14 (73.7)                   |
| Signs and symptoms                                  |                             |
| Fever                                               | 13 (68.4)                   |
| Cough                                               | 14 (73.7)                   |
| Fatigue                                             | 4 (21.1)                    |
| Chest pain                                          | 1 (5.3)                     |
| Gastrointestinal symptoms**                         | 10 (52.6)                   |
| Dyspnea                                             | 9 (47.4)                    |
| Myalgia                                             | 1 (5.3)                     |
| Administration of mechanical ventilation            | 15 (78.9)                   |
| Non-invasive                                        | 1 (5.3)                     |
| Invasive                                            | 14 (73.7)                   |
| Admission to intensive care unit                    | 16 (84.2)                   |
| Renal replacement therapy                           | 7 (36.8)                    |
| Extracorporeal membrane oxygenation                 | 1 (5.3)                     |
| Clinical outcomes                                   |                             |
| In-hospital death                                   | 15 (78.9)                   |
| Duration from illness onset to death, days          | 31[23, 36]                  |
| Hospital discharge                                  | 4 (21.1)                    |
| Duration from illness onset to discharge, days      | 41[37, 46]                  |
| Complications                                       |                             |
| Acute kidney injury                                 | 13 (68.4)                   |
| Acute respiratory distress syndrome                 | 15 (78.9)                   |
| Acute heart failure                                 | 16 (88.9)                   |
| Cardiac injury                                      | 16 (88.9)                   |
| Sepsis                                              | 15 (78.9)                   |
| Disseminated intravascular coagulation              | 11 (57.9)                   |

1. Data were provided as number (percentage), median (interquartile range).

2. Serum Amylase Level, in a healthy individual, a normal blood amylase level ranges from 0-115 units per liter (U/L) in our hospital. Patients with serum amylase >345 U/L were classified into group of above 3 Folds of ULN (N=19).

3. Severe pneumonia\*, the illness severity was classified according to Guidance for Corona Virus Disease 2019 (6/7th edition) released by the National Health Commission of China; Gastrointestinal symptoms\*\*,including anorexia, nausea or vomiting, diarrhea, abdominal pain.
